# Supplementary material
Source: publisher figshare collection journal article supplement (https://acs.figshare.com/ndownloader/files/3592422)
Supplement: Supplementary file 1 [file 3592422]

# Acetone-Assisted Oxygen Vacancy Diffusion on TiO<sub>2</sub>(110)

*Yaobiao Xia,<sup>†, ‡</sup> Bo Zhang,<sup>†, ‡</sup> Jingyun Ye,<sup>§</sup> Qingfeng Ge,<sup>\*, §</sup> Zhenrong Zhang<sup>\*, †</sup>*

<sup>†</sup>Department of Physics, Baylor University, Waco, TX 76798

<sup>§</sup>Department of Chemistry and Biochemistry, Southern Illinois University, Carbondale, IL 62901

\*Corresponding authors:

zhenrong\_zhang@baylor.edu

qge@chem.siu.edu

S1. An STM movie shows both across-row and along-row motion of acetone at RT.

S2. Two STM images taken at a)  $t = 0$  and b)  $t = 30$  min on the same area of the  $\text{TiO}_2(110)$  surface with 0.05 ML of acetone. Magnified images c) and d) from a) and b) represent the overall change in vacancy pattern.

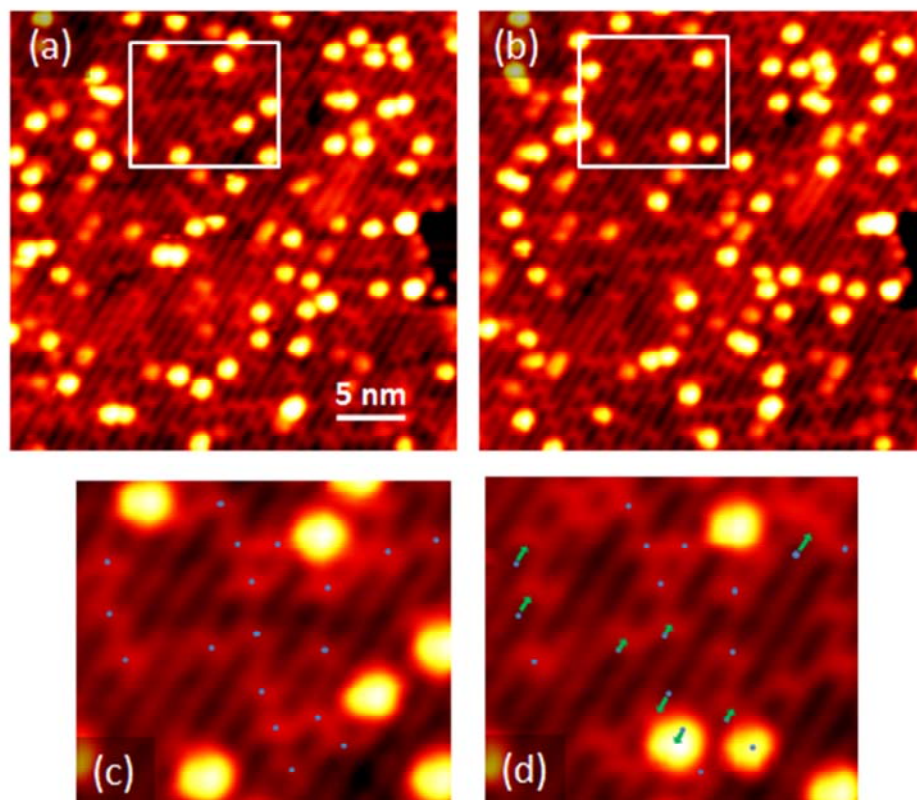

S2. Two STM images taken at a)  $t = 0$  and b)  $t = 34$  min on the same area of the  $\text{TiO}_2(110)$  surface with 0.05 ML of acetone. Magnified images c) and d) from a) and b) represent the overall change in vacancy pattern.
